# Supplementary material
Source: publisher figshare collection journal article supplement (https://brill.figshare.com/articles/dataset/_/20342628)
Supplement: Supplementary file 1 [file 1]

**Table S5.** Accession numbers for the additional COI sequences used in the phylogenetic analysis for the Holarctic *Lygus* species.

| <b>Species</b>             | <b>COI Genbank accession number</b> | <b>Reference</b>        |
|----------------------------|-------------------------------------|-------------------------|
| <i>Lygus aeratus</i>       | KR564324                            | Hebert et al. 2016      |
| <i>Lygus atriflavus</i>    | KR035035                            | Gwiazdowski et al. 2015 |
| <i>Lygus atritibialis</i>  | KR036451                            | Gwiazdowski et al. 2015 |
| <i>Lygus borealis</i>      | KR560711                            | Hebert et al. 2016      |
| <i>Lygus borealis</i>      | HQ105901                            | Park et al. 2011        |
| <i>Lygus borealis</i>      | KR030539                            | Gwiazdowski et al. 2015 |
| <i>Lygus borealis</i>      | KJ411639                            | Fleming et al. 2015     |
| <i>Lygus ceanothi</i>      | KR039876                            | Gwiazdowski et al. 2015 |
| <i>Lygus elisus</i>        | KR560112                            | Hebert et al. 2016      |
| <i>Lygus elisus</i>        | HQ105904                            | Park et al. 2011        |
| <i>Lygus elisus</i>        | KJ411641                            | Fleming et al. 2015     |
| <i>Lygus elisus</i>        | KR031044                            | Gwiazdowski et al. 2015 |
| <i>Lygus gemellatus</i>    | KM022922                            | Raupach et al. 2014     |
| <i>Lygus gemellatus</i>    | KM023105                            | Raupach et al. 2014     |
| <i>Lygus hesperus</i>      | HQ105907                            | Park et al. 2011        |
| <i>Lygus hesperus</i>      | JF823520                            | Zhou et al. 2012        |
| <i>Lygus hesperus</i>      | KR030581                            | Gwiazdowski et al. 2015 |
| <i>Lygus hesperus</i>      | KJ411640                            | Fleming et al. 2015     |
| <i>Lygus humeralis</i>     | HQ105911                            | Park et al. 2011        |
| <i>Lygus humeralis</i>     | KR034512                            | Gwiazdowski et al. 2015 |
| <i>Lygus keltoni</i>       | KR567855                            | Hebert et al. 2016      |
| <i>Lygus keltoni</i>       | KR030920                            | Gwiazdowski et al. 2015 |
| <i>Lygus lineolaris</i>    | KR341291                            | Hebert et al. 2016      |
| <i>Lygus lineolaris</i>    | HQ105913                            | Park et al. 2011        |
| <i>Lygus lineolaris</i>    | KR030547                            | Gwiazdowski et al. 2015 |
| <i>Lygus lupini</i>        | KU875431                            | Sikes et al. 2017       |
| <i>Lygus plagiatus</i>     | KR570034                            | Hebert et al. 2016      |
| <i>Lygus plagiatus</i>     | HQ105923                            | Park et al. 2011        |
| <i>Lygus plagiatus</i>     | KR034535                            | Gwiazdowski et al. 2015 |
| <i>Lygus potentillae</i>   | KR034520                            | Gwiazdowski et al. 2015 |
| <i>Lygus pratensis</i>     | KM021854                            | Raupach et al. 2014     |
| <i>Lygus pratensis</i>     | KM021926                            | Raupach et al. 2014     |
| <i>Lygus pratensis</i>     | KM022170                            | Raupach et al. 2014     |
| <i>Lygus pratensis</i>     | KM022498                            | Raupach et al. 2014     |
| <i>Lygus pratensis</i>     | KM023018                            | Raupach et al. 2014     |
| <i>Lygus pratensis</i>     | KM023020                            | Raupach et al. 2014     |
| <i>Lygus pratensis</i>     | KM023049                            | Raupach et al. 2014     |
| <i>Lygus punctatus</i>     | KR575994                            | Hebert et al. 2016      |
| <i>Lygus punctatus</i>     | KR032248                            | Gwiazdowski et al. 2015 |
| <i>Lygus punctatus</i>     | KU875432                            | Sikes et al. 2017       |
| <i>Lygus rubroclarus</i>   | HQ105925                            | Park et al. 2011        |
| <i>Lygus rubrosignatus</i> | KR560404                            | Hebert et al. 2016      |
| <i>Lygus rubrosignatus</i> | KR031408                            | Gwiazdowski et al. 2015 |
| <i>Lygus robustus</i>      | KR562620                            | Hebert et al. 2016      |
| <i>Lygus robustus</i>      | KR030676                            | Gwiazdowski et al. 2015 |
| <i>Lygus robustus</i>      | KR567832                            | Hebert et al. 2016      |

|                           |          |                         |
|---------------------------|----------|-------------------------|
| <i>Lygus rufidorsus</i>   | KR034197 | Gwiazdowski et al. 2015 |
| <i>Lygus rugulipennis</i> | KR043021 | Gwiazdowski et al. 2015 |
| <i>Lygus rugulipennis</i> | KR033037 | Gwiazdowski et al. 2015 |
| <i>Lygus rugulipennis</i> | KU875434 | Sikes et al. 2017       |
| <i>Lygus rugulipennis</i> | GQ292108 | Jung et al. 2011        |
| <i>Lygus rugulipennis</i> | MH142555 | Piemontese et al. 2020  |
| <i>Lygus rugulipennis</i> | MH142556 | Piemontese et al. 2020  |
| <i>Lygus rugulipennis</i> | MH142557 | Piemontese et al. 2020  |
| <i>Lygus rugulipennis</i> | MH142558 | Piemontese et al. 2020  |
| <i>Lygus rugulipennis</i> | MH142559 | Piemontese et al. 2020  |
| <i>Lygus rugulipennis</i> | MH142560 | Piemontese et al. 2020  |
| <i>Lygus rugulipennis</i> | MH142561 | Piemontese et al. 2020  |
| <i>Lygus rugulipennis</i> | MH142562 | Piemontese et al. 2020  |
| <i>Lygus rugulipennis</i> | MH142563 | Piemontese et al. 2020  |
| <i>Lygus rugulipennis</i> | KM021513 | Raupach et al. 2014     |
| <i>Lygus rugulipennis</i> | KM021762 | Raupach et al. 2014     |
| <i>Lygus rugulipennis</i> | KM022239 | Raupach et al. 2014     |
| <i>Lygus rugulipennis</i> | KM022398 | Raupach et al. 2014     |
| <i>Lygus rugulipennis</i> | KM022596 | Raupach et al. 2014     |
| <i>Lygus rugulipennis</i> | KM022805 | Raupach et al. 2014     |
| <i>Lygus rugulipennis</i> | KM022898 | Raupach et al. 2014     |
| <i>Lygus rugulipennis</i> | KM022988 | Raupach et al. 2014     |
| <i>Lygus scudleri</i>     | KR034844 | Gwiazdowski et al. 2015 |
| <i>Lygus shulli</i>       | KU875436 | Sikes et al. 2017       |
| <i>Lygus shulli</i>       | KR572628 | Hebert et al. 2016      |
| <i>Lygus shulli</i>       | KR031373 | Gwiazdowski et al. 2015 |
| <i>Lygus solidaginis</i>  | KR040337 | Gwiazdowski et al. 2015 |
| <i>Lygus striatus</i>     | KR033264 | Gwiazdowski et al. 2015 |
| <i>Lygus striatus</i>     | HQ105926 | Park et al. 2011        |
| <i>Lygus striatus</i>     | KR569782 | Hebert et al. 2016      |
| <i>Lygus unctuosus</i>    | HQ105927 | Park et al. 2011        |
| <i>Lygus unctuosus</i>    | KR566862 | Hebert et al. 2016      |
| <i>Lygus unctuosus</i>    | KR036877 | Gwiazdowski et al. 2015 |
| <i>Lygus vanduzeei</i>    | KR035942 | Gwiazdowski et al. 2015 |
| <i>Lygus vanduzeei</i>    | KR569678 | Hebert et al. 2016      |
| <i>Lygus wagneri</i>      | KM021504 | Raupach et al. 2014     |

## References

- Fleming, D. E., Roehrdanz, R. L., Allen, K. C., & Musser, F. R. (2015). Comparisons of *Lygus lineolaris* (Hemiptera: Miridae) populations from two distinct geographical regions of Mississippi. *Environmental entomology*, 44(3), 898-906.
- Gwiazdowski, R. A., Footitt, R. G., Maw, H. E. L., & Hebert, P. D. (2015). The Hemiptera (Insecta) of Canada: constructing a reference library of DNA barcodes. *PloS one*, 10(4), e0125635.
- Hebert, P. D., Ratnasingham, S., Zakharov, E. V., Telfer, A. C., Levesque-Beaudin, V., Milton, M. A., ... & DeWaard, J. R. (2016). Counting animal species with DNA barcodes:

Canadian insects. *Philosophical Transactions of the Royal Society B: Biological Sciences*, 371(1702), 20150333.

- Jung, S., Duwal, R. K., & Lee, S. (2011). COI barcoding of true bugs (Insecta, Heteroptera). *Molecular Ecology Resources*, 11(2), 266-270.
- Park, D. S., Footitt, R., Maw, E., & Hebert, P. D. (2011). Barcoding bugs: DNA-based identification of the true bugs (Insecta: Hemiptera: Heteroptera). *Plos one*, 6(4), e18749.
- Piemontese, L., Giovannini, I., Guidetti, R., Pellegri, G., Dioli, P., Maistrello, L., ... & Cesari, M. (2020). The species identification problem in mirids (Hemiptera: Heteroptera) highlighted by DNA barcoding and species delimitation studies. *The European Zoological Journal*, 87(1), 310-324.
- Raupach, M. J., Hendrich, L., K  chler, S. M., Deister, F., Morini  re, J., & Gossner, M. M. (2014). Building-up of a DNA barcode library for true bugs (Insecta: Hemiptera: Heteroptera) of Germany reveals taxonomic uncertainties and surprises. *PloS one*, 9(9), e106940.
- Sikes, D. S., Bowser, M., Morton, J. M., Bickford, C., Meierotto, S., & Hildebrandt, K. (2017). Building a DNA barcode library of Alaska's non-marine arthropods. *Genome*, 60(3), 248-259.
- Zhou, C., Kandemir, I., Walsh, D. B., Zalom, F. G., & Lavine, L. C. (2012). Identification of *Lygus hesperus* by DNA barcoding reveals insignificant levels of genetic structure among distant and habitat diverse populations. *PLoS One*, 7(3), e34528.
