# Supplementary material
Source: publisher figshare collection journal article supplement (https://brill.figshare.com/articles/dataset/_/20342628)
Supplement: Supplementary file 2 [file 1]

**Table S4.** The specimens corresponding to each haplotype.

| <b>COI full dataset</b> |                                                                                                                                                                                                                                                                                                                                                                                                                                                                                                                                                                                                                                                                                                                                                                                                                                              |
|-------------------------|----------------------------------------------------------------------------------------------------------------------------------------------------------------------------------------------------------------------------------------------------------------------------------------------------------------------------------------------------------------------------------------------------------------------------------------------------------------------------------------------------------------------------------------------------------------------------------------------------------------------------------------------------------------------------------------------------------------------------------------------------------------------------------------------------------------------------------------------|
| h1                      | Lygus_rugulipennis_Chukotka_prov_LO54<br>Lygus_rugulipennis_Chukotka_prov_LO74<br>Lygus_rugulipennis_Irkutsk_prov_LO90<br>Lygus_rugulipennis_Leningrad_prov_LO26<br>Lygus_rugulipennis_Ryazan_prov_LO25<br>Lygus_rugulipennis_Saratov_prov_LO59<br>Lygus_rugulipennis_Tatarstan_LO46<br>Lygus_rugulipennis_Tyumen_prov_LO67<br>Lygus_rugulipennis_Volgograd_prov_LO113<br>Lygus_rugulipennis_Lipetsk_prov_LO01<br>Lygus_rugulipennis_Sverdlovsk_prov_LO115<br>Lygus_rugulipennis_Voronezh_prov_LO43<br>Lygus_rugulipennis_Bulgaria_LO14<br>Lygus_rugulipennis_Ryazan_prov_LO23<br>Lygus_rugulipennis_France_LO11<br>Lygus_rugulipennis_Krasnoyarsk_prov_LO55<br>Lygus_rugulipennis_Norway_LO12<br>Lygus_rugulipennis_Norway_LO13<br>Lygus_rugulipennis_Voronezh_prov_LO44                                                                    |
| h2                      | Lygus_rugulipennis_Belgorod_prov_LO20                                                                                                                                                                                                                                                                                                                                                                                                                                                                                                                                                                                                                                                                                                                                                                                                        |
| h3                      | Lygus_rugulipennis_Voronezh_prov_LO28                                                                                                                                                                                                                                                                                                                                                                                                                                                                                                                                                                                                                                                                                                                                                                                                        |
| h4                      | Lygus_rugulipennis_Voronezh_prov_LO29                                                                                                                                                                                                                                                                                                                                                                                                                                                                                                                                                                                                                                                                                                                                                                                                        |
| h5                      | Lygus_punctatus_Ryazan_prov_LO24<br>Lygus_punctatus_Sverdlovsk_prov_LO97<br>Lygus_punctatus_Sverdlovsk_prov_LO98<br>Lygus_punctatus_Voronezh_prov_LO27                                                                                                                                                                                                                                                                                                                                                                                                                                                                                                                                                                                                                                                                                       |
| h6                      | Lygus_punctatus_Irkutsk_prov_LO84                                                                                                                                                                                                                                                                                                                                                                                                                                                                                                                                                                                                                                                                                                                                                                                                            |
| h7                      | Lygus_pratensis_Belgorod_prov_LO47<br>Lygus_pratensis_Belarus_LO76<br>Lygus_pratensis_Dagestan_LO75<br>Lygus_pratensis_or_wagneri_Voronezh_prov_LO41<br>Lygus_pratensis_Saratov_prov_LO49<br>Lygus_pratensis_Saratov_prov_LO50<br>Lygus_pratensis_Tatarstan_LO45<br>Lygus_pratensis_Voronezh_prov_LO30<br>Lygus_pratensis_Voronezh_prov_LO42<br>Lygus_pratensis_Voronezh_prov_LO51<br>Lygus_wagneri_St_Petersburg_LO70<br>Lygus_pratensis_Czech_rep_LO07<br>Lygus_pratensis_Stavropol_prov_LO93<br>Lygus_pratensis_Ukraine_LO08<br>Lygus_wagneri_Komi_rep_LO108<br>Lygus_pratensis_Bashkortostan_rep_LO57<br>Lygus_pratensis_Voronezh_prov_LO32<br>Lygus_pratensis_or_wagneri_Belgorod_prov_LO17<br>Lygus_pratensis_Italy_LO79<br>Lygus_pratensis_Poland_LO06<br>Lygus_wagneri_or_pratensis_Czech_rep_LO09<br>Lygus_pratensis_Tatarstan_LO02 |

|                            |                                                                                                                                                                                                                                                                                                                                                                                                                                                                                                                                                                                                               |
|----------------------------|---------------------------------------------------------------------------------------------------------------------------------------------------------------------------------------------------------------------------------------------------------------------------------------------------------------------------------------------------------------------------------------------------------------------------------------------------------------------------------------------------------------------------------------------------------------------------------------------------------------|
|                            | Lygus_pratensis_Italy_MH359348<br>Lygus_pratensis_Saratov_prov_LO19<br>Lygus_pratensis_Sverdlovsk_prov_LO78                                                                                                                                                                                                                                                                                                                                                                                                                                                                                                   |
| h8                         | Lygus_pratensis_Bashkortostan_rep_LO77<br>Lygus_pratensis_Belgorod_prov_LO21<br>Lygus_pratensis_Irkutsk_prov_LO89<br>Lygus_pratensis_Saratov_prov_LO03<br>Lygus_pratensis_Saratov_prov_LO48<br>Lygus_wagneri_Irkutsk_prov_LO88<br>Lygus_wagneri_or_pratensis_Ryazan_prov_LO22<br>Lygus_wagneri_Sverdlovsk_prov_LO111<br>Lygus_pratensis_Belgorod_prov_LO16<br>Lygus_wagneri_Buryatia_LO04<br>Lygus_wagneri_Buryatia_LO10<br>Lygus_wagneri_Komi_rep_LO109                                                                                                                                                      |
| h9                         | Lygus_gemellatus_Astrakhan_prov_LO83<br>Lygus_gemellatus_Buryatia_LO61<br>Lygus_gemellatus_Irkutsk_prov_LO85<br>Lygus_gemellatus_Irkutsk_prov_LO86<br>Lygus_gemellatus_Irkutsk_prov_LO87<br>Lygus_gemellatus_Orenburg_prov_LO104<br>Lygus_gemellatus_Volgograd_prov_LO69<br>Lygus_gemellatus_Voronezh_prov_LO31<br>Lygus_gemellatus_Mongolia_LO100<br>Lygus_gemellatus_Saratov_prov_LO60<br>Lygus_gemellatus_Komi_rep_LO102<br>Lygus_gemellatus_Morocco_LO18<br>Lygus_gemellatus_Tyva_rep_LO92<br>Lygus_gemellatus_Volgograd_prov_LO05                                                                        |
| 10                         | Lygus_gemellatus_Tyumen_prov_LO65                                                                                                                                                                                                                                                                                                                                                                                                                                                                                                                                                                             |
| 11                         | Lygus_gemellatus_Astrakhan_prov_LO56                                                                                                                                                                                                                                                                                                                                                                                                                                                                                                                                                                          |
| 12                         | Lygus_sp_Kazakhstan_MH359347                                                                                                                                                                                                                                                                                                                                                                                                                                                                                                                                                                                  |
| 13                         | Lygus_sp_Volgograd_prov_LO68                                                                                                                                                                                                                                                                                                                                                                                                                                                                                                                                                                                  |
| <b>COI reduced dataset</b> |                                                                                                                                                                                                                                                                                                                                                                                                                                                                                                                                                                                                               |
| h1a                        | Lygus_rugulipennis_Leningrad_prov_LO26<br>Lygus_rugulipennis_Ryazan_prov_LO25<br>Lygus_rugulipennis_Saratov_prov_LO59<br>Lygus_rugulipennis_Tatarstan_LO46<br>Lygus_rugulipennis_Tyumen_prov_LO67<br>Lygus_rugulipennis_Volgograd_prov_LO113<br>Lygus_rugulipennis_Lipetsk_prov_LO01<br>Lygus_rugulipennis_Sverdlovsk_prov_LO115<br>Lygus_rugulipennis_Voronezh_prov_LO43<br>Lygus_rugulipennis_Bulgaria_LO14<br>Lygus_rugulipennis_Ryazan_prov_LO23<br>Lygus_rugulipennis_France_LO11<br>Lygus_rugulipennis_Krasnoyarsk_prov_LO55<br>Lygus_rugulipennis_Norway_LO12<br>Lygus_rugulipennis_Voronezh_prov_LO44 |
| h1b                        | Lygus_rugulipennis_Chukotka_prov_LO54<br>Lygus_rugulipennis_Chukotka_prov_LO74<br>Lygus_rugulipennis_Irkutsk_prov_LO90                                                                                                                                                                                                                                                                                                                                                                                                                                                                                        |

|    |                                                                                                                                                                                                                                                                                                                                                                                                                                                                                                                                                                                                                                                                                                                                                                                                                                                                                                                           |
|----|---------------------------------------------------------------------------------------------------------------------------------------------------------------------------------------------------------------------------------------------------------------------------------------------------------------------------------------------------------------------------------------------------------------------------------------------------------------------------------------------------------------------------------------------------------------------------------------------------------------------------------------------------------------------------------------------------------------------------------------------------------------------------------------------------------------------------------------------------------------------------------------------------------------------------|
|    | Lygus_rugulipennis_Norway_LO13                                                                                                                                                                                                                                                                                                                                                                                                                                                                                                                                                                                                                                                                                                                                                                                                                                                                                            |
| h2 | Lygus_rugulipennis_Belgorod_prov_LO20                                                                                                                                                                                                                                                                                                                                                                                                                                                                                                                                                                                                                                                                                                                                                                                                                                                                                     |
| h3 | Lygus_rugulipennis_Voronezh_prov_LO28                                                                                                                                                                                                                                                                                                                                                                                                                                                                                                                                                                                                                                                                                                                                                                                                                                                                                     |
| h4 | Lygus_rugulipennis_Voronezh_prov_LO29                                                                                                                                                                                                                                                                                                                                                                                                                                                                                                                                                                                                                                                                                                                                                                                                                                                                                     |
| h5 | Lygus_punctatus_Ryazan_prov_LO24<br>Lygus_punctatus_Sverdlovsk_prov_LO97<br>Lygus_punctatus_Sverdlovsk_prov_LO98<br>Lygus_punctatus_Voronezh_prov_LO27                                                                                                                                                                                                                                                                                                                                                                                                                                                                                                                                                                                                                                                                                                                                                                    |
| h6 | Lygus_punctatus_Irkutsk_prov_LO84                                                                                                                                                                                                                                                                                                                                                                                                                                                                                                                                                                                                                                                                                                                                                                                                                                                                                         |
| h7 | Lygus_pratensis_Belgorod_prov_LO47<br>Lygus_pratensis_Belarus_LO76<br>Lygus_pratensis_Dagestan_LO75<br>Lygus_pratensis_or_wagneri_Voronezh_prov_LO41<br>Lygus_pratensis_Saratov_prov_LO49<br>Lygus_pratensis_Saratov_prov_LO50<br>Lygus_pratensis_Tatarstan_LO45<br>Lygus_pratensis_Voronezh_prov_LO30<br>Lygus_pratensis_Voronezh_prov_LO42<br>Lygus_pratensis_Voronezh_prov_LO51<br>Lygus_wagneri_St_Petersburg_LO70<br>Lygus_pratensis_Czech_rep_LO07<br>Lygus_pratensis_Stavropol_prov_LO93<br>Lygus_pratensis_Ukraine_LO08<br>Lygus_wagneri_Komi_rep_LO108<br>Lygus_pratensis_Bashkortostan_rep_LO57<br>Lygus_pratensis_Voronezh_prov_LO32<br>Lygus_pratensis_or_wagneri_Belgorod_prov_LO17<br>Lygus_pratensis_Italy_LO79<br>Lygus_pratensis_Poland_LO06<br>Lygus_wagneri_or_pratensis_Czech_rep_LO09<br>Lygus_pratensis_Tatarstan_LO02<br>Lygus_pratensis_Saratov_prov_LO19<br>Lygus_pratensis_Sverdlovsk_prov_LO78 |
| h8 | Lygus_pratensis_Bashkortostan_rep_LO77<br>Lygus_pratensis_Belgorod_prov_LO21<br>Lygus_pratensis_Irkutsk_prov_LO89<br>Lygus_pratensis_Saratov_prov_LO03<br>Lygus_pratensis_Saratov_prov_LO48<br>Lygus_wagneri_Irkutsk_prov_LO88<br>Lygus_wagneri_or_pratensis_Ryazan_prov_LO22<br>Lygus_wagneri_Sverdlovsk_prov_LO111<br>Lygus_pratensis_Belgorod_prov_LO16<br>Lygus_wagneri_Buryatia_LO04<br>Lygus_wagneri_Buryatia_LO10<br>Lygus_wagneri_Komi_rep_LO109                                                                                                                                                                                                                                                                                                                                                                                                                                                                  |
| h9 | Lygus_gemellatus_Astrakhan_prov_LO83<br>Lygus_gemellatus_Buryatia_LO61<br>Lygus_gemellatus_Irkutsk_prov_LO85<br>Lygus_gemellatus_Irkutsk_prov_LO86<br>Lygus_gemellatus_Irkutsk_prov_LO87<br>Lygus_gemellatus_Orenburg_prov_LO104<br>Lygus_gemellatus_Volgograd_prov_LO69                                                                                                                                                                                                                                                                                                                                                                                                                                                                                                                                                                                                                                                  |

|                         |                                                                                                                                                                                                                                                                                                                                                                                                                                                                                                                                                                                                                                                                                                                                                                                                                                                                                                                                                                                                                                                                |
|-------------------------|----------------------------------------------------------------------------------------------------------------------------------------------------------------------------------------------------------------------------------------------------------------------------------------------------------------------------------------------------------------------------------------------------------------------------------------------------------------------------------------------------------------------------------------------------------------------------------------------------------------------------------------------------------------------------------------------------------------------------------------------------------------------------------------------------------------------------------------------------------------------------------------------------------------------------------------------------------------------------------------------------------------------------------------------------------------|
|                         | Lygus_gemellatus_Voronezh_prov_LO31<br>Lygus_gemellatus_Mongolia_LO100<br>Lygus_gemellatus_Saratov_prov_LO60<br>Lygus_gemellatus_Komi_rep_LO102<br>Lygus_gemellatus_Morocco_LO18<br>Lygus_gemellatus_Tyva_rep_LO92<br>Lygus_gemellatus_Volgograd_prov_LO05                                                                                                                                                                                                                                                                                                                                                                                                                                                                                                                                                                                                                                                                                                                                                                                                     |
| h10                     | Lygus_gemellatus_Tyumen_prov_LO65                                                                                                                                                                                                                                                                                                                                                                                                                                                                                                                                                                                                                                                                                                                                                                                                                                                                                                                                                                                                                              |
| h11                     | Lygus_gemellatus_Astrakhan_prov_LO56                                                                                                                                                                                                                                                                                                                                                                                                                                                                                                                                                                                                                                                                                                                                                                                                                                                                                                                                                                                                                           |
| h13                     | Lygus_sp_Volgograd_prov_LO68                                                                                                                                                                                                                                                                                                                                                                                                                                                                                                                                                                                                                                                                                                                                                                                                                                                                                                                                                                                                                                   |
| <b>16S full dataset</b> |                                                                                                                                                                                                                                                                                                                                                                                                                                                                                                                                                                                                                                                                                                                                                                                                                                                                                                                                                                                                                                                                |
| h1                      | Lygus_punctatus_Yamalo-Nenets_dist_LO63<br>Lygus_punctatus_Irkutsk_prov_LO84<br>Lygus_punctatus_Ryazan_prov_LO24<br>Lygus_punctatus_Sverdlovsk_prov_LO98<br>Lygus_punctatus_Voronezh_prov_LO27<br>Lygus_rugulipennis_Belgorod_prov_LO20<br>Lygus_rugulipennis_Bulgaria_LO14<br>Lygus_rugulipennis_Chukotka_prov_LO54<br>Lygus_rugulipennis_Chukotka_prov_LO74<br>Lygus_rugulipennis_France_LO11<br>Lygus_rugulipennis_Leningrad_prov_LO26<br>Lygus_rugulipennis_Lipetsk_prov_LO01<br>Lygus_rugulipennis_Norway_LO12<br>Lygus_rugulipennis_Norway_LO13<br>Lygus_rugulipennis_Ryazan_prov_LO23<br>Lygus_rugulipennis_Ryazan_prov_LO25<br>Lygus_rugulipennis_Saratov_prov_LO59<br>Lygus_rugulipennis_Sverdlovsk_prov_LO115<br>Lygus_rugulipennis_Tatarstan_LO46<br>Lygus_rugulipennis_Krasnoyarsk_prov_LO55<br>Lygus_rugulipennis_Tyumen_prov_LO67<br>Lygus_rugulipennis_Volgograd_prov_LO113<br>Lygus_rugulipennis_Voronezh_prov_LO28<br>Lygus_rugulipennis_Voronezh_prov_LO29<br>Lygus_rugulipennis_Voronezh_prov_LO43<br>Lygus_rugulipennis_Voronezh_prov_LO44 |
| h2                      | Lygus_rugulipennis_Irkutsk_prov_LO90                                                                                                                                                                                                                                                                                                                                                                                                                                                                                                                                                                                                                                                                                                                                                                                                                                                                                                                                                                                                                           |
| h3                      | Lygus_pratensis_Bashkortostan_rep_LO57<br>Lygus_pratensis_Bashkortostan_rep_LO77<br>Lygus_pratensis_Belarus_LO76<br>Lygus_pratensis_Belgorod_prov_LO16<br>Lygus_pratensis_Belgorod_prov_LO21<br>Lygus_pratensis_Belgorod_prov_LO47<br>Lygus_pratensis_Czech_rep_LO07<br>Lygus_pratensis_Dagestan_LO75<br>Lygus_pratensis_Irkutsk_prov_LO89<br>Lygus_pratensis_Italy_LO79<br>Lygus_pratensis_or_wagneri_Belgorod_prov_LO17<br>Lygus_pratensis_or_wagneri_Voronezh_prov_LO41<br>Lygus_pratensis_Poland_LO06<br>Lygus_pratensis_Saratov_prov_LO03                                                                                                                                                                                                                                                                                                                                                                                                                                                                                                                 |

|                            |                                                                                                                                                                                                                                                                                                                                                                                                                                                                                                                                                                                                                                                                                                                                                                                                                                           |
|----------------------------|-------------------------------------------------------------------------------------------------------------------------------------------------------------------------------------------------------------------------------------------------------------------------------------------------------------------------------------------------------------------------------------------------------------------------------------------------------------------------------------------------------------------------------------------------------------------------------------------------------------------------------------------------------------------------------------------------------------------------------------------------------------------------------------------------------------------------------------------|
|                            | Lygus_pratensis_Saratov_prov_LO19<br>Lygus_pratensis_Saratov_prov_LO48<br>Lygus_pratensis_Saratov_prov_LO49<br>Lygus_pratensis_Saratov_prov_LO50<br>Lygus_pratensis_Tatarstan_LO02<br>Lygus_pratensis_Tatarstan_LO45<br>Lygus_pratensis_Ukraine_LO08<br>Lygus_pratensis_Voronezh_prov_LO32<br>Lygus_pratensis_Voronezh_prov_LO51<br>Lygus_wagneri_Buryatia_LO04<br>Lygus_wagneri_Buryatia_LO10<br>Lygus_wagneri_Komi_rep_LO108<br>Lygus_wagneri_or_pratensis_Czech_rep_LO09<br>Lygus_wagneri_or_pratensis_Ryazan_prov_LO22<br>Lygus_wagneri_St_Petersburg_LO70<br>Lygus_wagneri_Sverdlovsk_prov_LO111<br>Lygus_pratensis_Italy_MH359348                                                                                                                                                                                                   |
| h4                         | Lygus_pratensis_Voronezh_prov_LO30                                                                                                                                                                                                                                                                                                                                                                                                                                                                                                                                                                                                                                                                                                                                                                                                        |
| h5                         | Lygus_pratensis_Voronezh_prov_LO42                                                                                                                                                                                                                                                                                                                                                                                                                                                                                                                                                                                                                                                                                                                                                                                                        |
| H6                         | Lygus_gemellatus_Astrakhan_prov_LO56<br>Lygus_gemellatus_Astrakhan_prov_LO83<br>Lygus_gemellatus_Buryatia_LO61<br>Lygus_gemellatus_Irkutsk_prov_LO86<br>Lygus_gemellatus_Irkutsk_prov_LO87<br>Lygus_gemellatus_Komi_rep_LO102<br>Lygus_gemellatus_Morocco_LO18<br>Lygus_gemellatus_Orenburg_prov_LO104<br>Lygus_gemellatus_Tyva_rep_LO92<br>Lygus_gemellatus_Volgograd_prov_LO05<br>Lygus_gemellatus_Volgograd_prov_LO69<br>Lygus_gemellatus_Voronezh_prov_LO31<br>Lygus_gemellatus_Astrakhan_prov_LO81<br>Lygus_gemellatus_Bashkortostan_rep_LO103<br>Lygus_gemellatus_Belarus_LO99<br>Lygus_gemellatus_Tyumen_prov_LO72<br>Lygus_gemellatus_Astrakhan_prov_LO80<br>Lygus_gemellatus_Tyumen_prov_LO73<br>Lygus_sp_Volgograd_prov_LO68<br>Lygus_sp_Astrakhan_prov_LO82<br>Lygus_gemellatus_Mongolia_LO100<br>Lygus_sp_Kazakhstan_MH359347 |
| h7                         | Lygus_gemellatus_Mongolia_LO101                                                                                                                                                                                                                                                                                                                                                                                                                                                                                                                                                                                                                                                                                                                                                                                                           |
| <b>16S reduced dataset</b> |                                                                                                                                                                                                                                                                                                                                                                                                                                                                                                                                                                                                                                                                                                                                                                                                                                           |
| h1a                        | Lygus_rugulipennis_Belgorod_prov_LO20<br>Lygus_rugulipennis_France_LO11<br>Lygus_rugulipennis_Leningrad_prov_LO26<br>Lygus_rugulipennis_Lipetsk_prov_LO01<br>Lygus_rugulipennis_Norway_LO12<br>Lygus_rugulipennis_Ryazan_prov_LO23<br>Lygus_rugulipennis_Ryazan_prov_LO25<br>Lygus_rugulipennis_Saratov_prov_LO59<br>Lygus_rugulipennis_Sverdlovsk_prov_LO115                                                                                                                                                                                                                                                                                                                                                                                                                                                                             |

|     |                                                                                                                                                                                                                                                                                                                                                                                                                                             |
|-----|---------------------------------------------------------------------------------------------------------------------------------------------------------------------------------------------------------------------------------------------------------------------------------------------------------------------------------------------------------------------------------------------------------------------------------------------|
|     | Lygus_rugulipennis_Tatarstan_LO46<br>Lygus_rugulipennis_Tyumen_prov_LO67<br>Lygus_rugulipennis_Volgograd_prov_LO113<br>Lygus_rugulipennis_Voronezh_prov_LO28<br>Lygus_rugulipennis_Voronezh_prov_LO29<br>Lygus_rugulipennis_Voronezh_prov_LO43<br>Lygus_rugulipennis_Voronezh_prov_LO44                                                                                                                                                     |
| h1b | Lygus_rugulipennis_Chukotka_prov_LO54<br>Lygus_rugulipennis_Chukotka_prov_LO74<br>Lygus_rugulipennis_Norway_LO13                                                                                                                                                                                                                                                                                                                            |
| h1c | Lygus_rugulipennis_Krasnoyarsk_prov_LO55                                                                                                                                                                                                                                                                                                                                                                                                    |
| h1d | Lygus_punctatus_Yamalo-Nenets_dist_LO63<br>Lygus_punctatus_Irkutsk_prov_LO84<br>Lygus_punctatus_Ryazan_prov_LO24<br>Lygus_punctatus_Sverdlovsk_prov_LO98<br>Lygus_punctatus_Voronezh_prov_LO27                                                                                                                                                                                                                                              |
| h2  | Lygus_rugulipennis_Irkutsk_prov_LO90                                                                                                                                                                                                                                                                                                                                                                                                        |
| h3a | Lygus_pratensis_Dagestan_LO75<br>Lygus_pratensis_Poland_LO06<br>Lygus_pratensis_Saratov_prov_LO03<br>Lygus_pratensis_Saratov_prov_LO19<br>Lygus_pratensis_or_wagneri_Belgorod_prov_LO17<br>Lygus_pratensis_or_wagneri_Voronezh_prov_LO41<br>Lygus_wagneri_Buryatia_LO10<br>Lygus_wagneri_Sverdlovsk_prov_LO111                                                                                                                              |
| h3b | Lygus_pratensis_Bashkortostan_rep_LO57<br>Lygus_pratensis_Belarus_LO76<br>Lygus_pratensis_Belgorod_prov_LO47<br>Lygus_pratensis_Italy_LO79<br>Lygus_pratensis_Saratov_prov_LO49<br>Lygus_pratensis_Saratov_prov_LO50<br>Lygus_pratensis_Tatarstan_LO02<br>Lygus_pratensis_Tatarstan_LO45<br>Lygus_pratensis_Voronezh_prov_LO32<br>Lygus_pratensis_Voronezh_prov_LO51<br>Lygus_wagneri_Leningrad_prov_LO70<br>Lygus_pratensis_Italy_MH359348 |
| h3c | Lygus_pratensis_Belgorod_prov_LO16<br>Lygus_pratensis_Belgorod_prov_LO21<br>Lygus_pratensis_Irkutsk_prov_LO89<br>Lygus_pratensis_Saratov_prov_LO48<br>Lygus_wagneri_or_pratensis_Ryazan_prov_LO22                                                                                                                                                                                                                                           |
| h3d | Lygus_wagneri_or_pratensis_Czech_rep_LO09                                                                                                                                                                                                                                                                                                                                                                                                   |
| h3e | Lygus_pratensis_Bashkortostan_rep_LO77                                                                                                                                                                                                                                                                                                                                                                                                      |
| h3f | Lygus_wagneri_Komi_rep_LO108                                                                                                                                                                                                                                                                                                                                                                                                                |
| h3g | Lygus_wagneri_Buryatia_LO04                                                                                                                                                                                                                                                                                                                                                                                                                 |
| h4  | Lygus_pratensis_Voronezh_prov_LO30                                                                                                                                                                                                                                                                                                                                                                                                          |
| h5  | Lygus_pratensis_Voronezh_prov_LO42                                                                                                                                                                                                                                                                                                                                                                                                          |
| h6a | Lygus_gemellatus_Astrakhan_prov_LO56<br>Lygus_gemellatus_Astrakhan_prov_LO83<br>Lygus_gemellatus_Buryatia_LO61<br>Lygus_gemellatus_Irkutsk_prov_LO86                                                                                                                                                                                                                                                                                        |

|     |                                                                                                                                                                                                                                                                                                                          |
|-----|--------------------------------------------------------------------------------------------------------------------------------------------------------------------------------------------------------------------------------------------------------------------------------------------------------------------------|
|     | Lygus_gemellatus_Irkutsk_prov_LO87<br>Lygus_gemellatus_Komi_rep_LO102<br>Lygus_gemellatus_Morocco_LO18<br>Lygus_gemellatus_Tyva_rep_LO92<br>Lygus_gemellatus_Tyumen_prov_LO72<br>Lygus_gemellatus_Tyumen_prov_LO73                                                                                                       |
| h6b | Lygus_gemellatus_Orenburg_prov_LO104<br>Lygus_gemellatus_Volgograd_prov_LO05<br>Lygus_gemellatus_Volgograd_prov_LO69<br>Lygus_gemellatus_Voronezh_prov_LO31<br>Lygus_gemellatus_Astrakhan_prov_LO81<br>Lygus_gemellatus_Bashkortostan_rep_LO103<br>Lygus_gemellatus_Belarus_LO99<br>Lygus_gemellatus_Astrakhan_prov_LO80 |
| h6c | Lygus_sp_Astrakhan_prov_LO82<br>Lygus_sp_Volgograd_prov_LO68<br>Lygus_gemellatus_Mongolia_LO100<br>Lygus_sp_Kazakhstan_MH359347                                                                                                                                                                                          |
| h7  | Lygus_gemellatus_Mongolia_LO101                                                                                                                                                                                                                                                                                          |
