# Supplementary material
Source: publisher figshare collection journal article supplement (https://brill.figshare.com/articles/dataset/_/20342628)
Supplement: Supplementary file 3 [file 1]

**Table S2.** The best ratio(s) of measurements for species discrimination obtained via the PCA ratio spectrum, and the best three ratios for species separation in pairs, obtained via the LDA ratio extractor.

| The PCA ratio spectrum                           | Ratio for PC1                                          |                                                                                        |            | Ratio for PC2                                    |                                                                                        |            |                                                        |                                                                                        |            |
|--------------------------------------------------|--------------------------------------------------------|----------------------------------------------------------------------------------------|------------|--------------------------------------------------|----------------------------------------------------------------------------------------|------------|--------------------------------------------------------|----------------------------------------------------------------------------------------|------------|
| Male                                             | hemelytron length/vertex width (distance between eyes) |                                                                                        |            | antennal segment 1/scutellum width               |                                                                                        |            |                                                        |                                                                                        |            |
|                                                  | cuneus length/vertex width (distance between eyes)     |                                                                                        |            | —                                                |                                                                                        |            |                                                        |                                                                                        |            |
| Female                                           | scutellum width/antennal segment 1                     |                                                                                        |            | —                                                |                                                                                        |            |                                                        |                                                                                        |            |
| The LDA ratio extractor                          | Ratio no. 1                                            |                                                                                        |            | Ratio no. 2                                      |                                                                                        |            | Ratio no. 3                                            |                                                                                        |            |
|                                                  |                                                        | Ranges (means) of measurements (mm)                                                    | delta.size |                                                  | Ranges (means) of measurements (mm)                                                    | delta.size |                                                        | Ranges (means) of measurements (mm)                                                    | delta.size |
| Male                                             |                                                        |                                                                                        |            |                                                  |                                                                                        |            |                                                        |                                                                                        |            |
| <i>Lygus pratensis</i> – <i>Lygus gemellatus</i> | Vertex InterOcDi/AntSeg2 length                        | 0.38 – 0.45 (0.41)/<br>1.50 – 1.75 (1.62)<br>0.43 – 0.48 (0.45)/<br>1.40 – 1.73 (1.51) | 0,0423     | scutellum length/clavus length max               | 0.80 – 0.95 (0.88)/<br>2.13 – 2.55 (2.32)<br>0.83 – 0.98 (0.92)/<br>2.13 – 2.45 (2.29) | 0,05480    | Width of head/Height of head                           | 1.05 – 1.20 (1.12)/<br>0.83 – 0.93 (0.88)<br>1.05 – 1.20 (1.12)/<br>0.85 – 0.98 (0.91) | 0,07026    |
| <i>Lygus punctatus</i> – <i>Lygus gemellatus</i> | Width of head/body width (widest part of hemelytron)   | 1.13 – 1.20 (1.16)/<br>2.63 – 3.10 (2.91)<br>1.05 – 1.20 (1.12)/<br>2.35 – 2.75 (2.55) | 0,40073    | hemelytron forewings length/cuneus length middle | 4.50 – 5.60 (4.99)/<br>1.15 – 1.53 (1.32)<br>4.00 – 4.80 (4.39)/<br>1.10 – 1.33 (1.20) | 0,43668    | Pronotum length/Body length                            | 1.15 – 1.53 (1.29)/<br>5.90 – 7.20 (6.40)<br>1.00 – 1.23 (1.09)/<br>5.30 – 6.30 (5.75) | 0,46798    |
| <i>Lygus wagneri</i> – <i>Lygus gemellatus</i>   | Vertex InterOcDi/AntSeg2 length                        | 0.43 – 0.50 (0.44)/<br>1.48 – 1.80 (1.68)<br>0.43 – 0.48 (0.45)/<br>1.40 – 1.73 (1.51) | 0,09825    | hemelytron forewings length/cuneus length middle | 4.40 – 5.50 (4.85)/<br>1.15 – 1.43 (1.31)<br>4.00 – 4.80 (4.39)/<br>1.10 – 1.33 (1.20) | 0,10137    | Height of head/body width (widest part of hemelytron ) | 0.85 – 1.03 (0.94)/<br>2.60 – 2.98 (2.82)<br>0.85 – 0.98 (0.91)/<br>2.35 – 2.75 (2.55) | 0,10317    |
| <i>Lygus punctatus</i> – <i>Lygus pratensis</i>  | Width of head/Vertex InterOcDi                         | 1.13 – 1.20 (1.16)/<br>0.43 – 0.50 (0.47)<br>1.05 – 1.20 (1.12)/<br>0.38 – 0.45 (0.41) | 0,31405    | Width of head/AntSeg1 length                     | 1.13 – 1.20 (1.16)/<br>0.53 – 0.68 (0.62)<br>1.05 – 1.20 (1.12)/<br>0.50 – 0.60 (0.55) | 0,35139    | Width of head/Pronotum length                          | 1.13 – 1.20 (1.16)/<br>1.15 – 1.53 (1.29)<br>1.05 – 1.20 (1.12)/<br>0.95 – 1.20 (1.09) | 0,38369    |
| <i>Lygus rugulipennis</i> –                      | Pronotum length/cuneus length middle                   | 1.05 – 1.25 (1.15)/<br>1.00 – 1.15 (1.10)                                              | 0,19486    | Cun clyp length/corium length                    | 4.10 – 5.00 (4.57)/<br>2.35 – 2.73 (2.52)                                              | 0,23543    | Vertex InterOcDi/AntSeg2 length                        | 0.40 – 0.45 (0.43)/<br>1.35 – 1.70 (1.53)                                              | 0,27247    |

|                                                          |                                                                      |                                                                                                    |         |                                                          |                                                                                                    |         |                                                                             |                                                                                                    |         |
|----------------------------------------------------------|----------------------------------------------------------------------|----------------------------------------------------------------------------------------------------|---------|----------------------------------------------------------|----------------------------------------------------------------------------------------------------|---------|-----------------------------------------------------------------------------|----------------------------------------------------------------------------------------------------|---------|
| <i>Lygus pratensis</i>                                   |                                                                      | 1.05 – 1.20<br>(1.12)/<br>1.10 – 1.40<br>(1.27)                                                    |         |                                                          | 4.30 – 5.60<br>(4.98)/<br>2.33 – 2.83<br>(2.59)                                                    |         |                                                                             | 0.38 – 0.45<br>(0.41)/<br>1.50 – 1.75<br>(1.62)                                                    |         |
| <i>Lygus wagneri</i><br>–<br><i>Lygus pratensis</i>      | Cun clyp<br>length/<br>Body length                                   | 4.80 – 5.60<br>(5.19)/<br>5.70 – 6.80<br>(6.19)<br>4.30 – 5.60<br>(4.98)/<br>5.10 – 7.00<br>(6.11) | 0,09710 | Vertex<br>InterOcDi/<br>Pronotum<br>length               | 0.43 – 0.50<br>(0.44)/<br>1.03 – 1.40<br>(1.15)<br>0.38 – 0.45<br>(0.41)/<br>1.05 – 1.20<br>(1.12) | 0,09885 | Vertex<br>InterOcDi/<br>body width<br>(widest part<br>of<br>hemelytron<br>) | 0.43 – 0.50<br>(0.44)/<br>2.60 – 2.98<br>(2.82)<br>0.38 – 0.45<br>(0.41)/<br>2.20 – 2.85<br>(2.56) | 0,10253 |
| <i>Lygus rugulipennis</i><br>–<br><i>Lygus punctatus</i> | Width of<br>head/<br>Pronotum<br>width                               | 1.05 – 1.15<br>(1.10)/<br>1.90 – 2.18<br>(2.03)<br>1.13 – 1.20<br>(1.16)/<br>2.28 – 2.55<br>(2.37) | 0,42076 | Pronotum<br>length/<br>hemelytron<br>forewings<br>length | 1.05 – 1.25<br>(1.15)/<br>3.50 – 4.60<br>(4.15)<br>1.15 – 1.53<br>(1.29)/<br>4.50 – 5.60<br>(4.99) | 0,51977 | Body<br>length/<br>cuneus<br>length<br>middle                               | 4.90 – 5.90<br>(5.45)/<br>1.00 – 1.15<br>(1.10)<br>5.90 – 7.20<br>(6.40)/<br>1.15 – 1.53<br>(1.32) | 0,5869  |
| <i>Lygus wagneri</i><br>–<br><i>Lygus rugulipennis</i>   | Width of<br>head/<br>cuneus length<br>middle                         | 1.08 – 1.20<br>(1.13)/<br>1.15 – 1.43<br>(1.31)<br>1.05 – 1.15<br>(1.10)/<br>1.00 – 1.15<br>(1.10) | 0,16200 | Cun clyp<br>length/<br>Body length                       | 4.80 – 5.60<br>(5.19)/<br>5.70 – 6.80<br>(6.19)<br>4.10 – 5.00<br>(4.57)/<br>4.90 – 5.90<br>(5.45) | 0,16593 | AntSeg2<br>length/<br>Height of<br>head                                     | 1.48 – 1.80<br>(1.68)/<br>0.85 – 1.03<br>(0.94)<br>1.35 – 1.70<br>(1.53)/<br>0.83 – 0.93<br>(0.87) | 0,17047 |
| <b>Female</b>                                            |                                                                      |                                                                                                    |         |                                                          |                                                                                                    |         |                                                                             |                                                                                                    |         |
| <i>Lygus punctatus</i><br>–<br><i>Lygus gemellatus</i>   | Width of<br>head/<br>Hind Tibia<br>length                            | 1.10 – 1.25<br>(1.17)/<br>2.60 – 3.08<br>(2.89)<br>1.08 – 1.23<br>(1.15)/<br>2.45 – 2.80<br>(2.59) | 0,2412  | AntSeg1<br>length/<br>Height of<br>head                  | 0.55 – 0.68<br>(0.63)/<br>0.90 – 1.03<br>(0.97)<br>0.45 – 0.63<br>(0.53)/<br>0.88 – 1.00<br>(0.96) | 0,29306 | Vertex<br>InterOcDi/<br>Height of<br>head                                   | 0.45 – 0.55<br>(0.50)/<br>0.90 – 1.03<br>(0.97)<br>0.43 – 0.53<br>(0.50)/<br>0.88 – 1.00<br>(0.96) | 0,33820 |
| <i>Lygus wagneri</i><br>–<br><i>Lygus gemellatus</i>     | Width of<br>head/<br>body width<br>(widest part<br>of<br>hemelytron) | 1.08 – 1.23<br>(1.17)/<br>2.73 – 3.03<br>(2.87)<br>1.08 – 1.23<br>(1.15)/<br>2.45 – 2.88<br>(2.65) | 0,18465 | scutellum<br>width/<br>corium<br>length                  | 0.95 – 1.20<br>(1.08)/<br>2.45 – 2.98<br>(2.79)<br>0.95 – 1.20<br>(1.08)/<br>2.43 – 2.78<br>(2.57) | 0,21026 | Hind Tibia<br>length/<br>Height of<br>head                                  | 2.43 – 3.03<br>(2.79)/<br>0.88 – 1.03<br>(0.97)<br>2.45 – 2.80<br>(2.59)/<br>0.88 – 1.00<br>(0.96) | 0,29896 |
| <i>Lygus punctatus</i><br>–<br><i>Lygus pratensis</i>    | Width of<br>head/<br>AntSeg1<br>length                               | 1.10 – 1.25<br>(1.17)/<br>0.55 – 0.68<br>(0.63)<br>1.10 – 1.25<br>(1.14)/<br>0.48 – 0.60<br>(0.53) | 0,25644 | Width of<br>head/<br>clavus length<br>max                | 1.10 – 1.25<br>(1.17)/<br>2.10 – 2.78<br>(2.55)<br>1.10 – 1.25<br>(1.14)/<br>2.18 – 2.55<br>(2.31) | 0,28048 | AntSeg2<br>length/<br>Body<br>length                                        | 1.55 – 1.83<br>(1.71)/<br>5.10 – 6.70<br>(6.15)<br>1.10 – 1.25<br>(1.14)/<br>5.10 – 6.60<br>(5.78) | 0,29681 |
| <i>Lygus wagneri</i><br>–                                | Width of<br>head/<br>clavus length<br>max                            | 1.08 – 1.23<br>(1.17)/<br>2.28 – 2.70<br>(2.51)                                                    | 0,23668 | Pronotum<br>width/<br>body width<br>(widest part         | 2.13 – 2.50<br>(2.32)/<br>2.73 – 3.03<br>(2.87)                                                    | 0,25816 | Height of<br>head/<br>scutellum<br>length                                   | 0.88 – 1.03<br>(0.97)/<br>0.83 – 1.00<br>(0.91)                                                    | 0,29029 |

|                                                          |                                                                        |                                                                                                    |         |                                                                         |                                                                                                    |         |                                                 |                                                                                                    |         |
|----------------------------------------------------------|------------------------------------------------------------------------|----------------------------------------------------------------------------------------------------|---------|-------------------------------------------------------------------------|----------------------------------------------------------------------------------------------------|---------|-------------------------------------------------|----------------------------------------------------------------------------------------------------|---------|
| <i>Lygus pratensis</i>                                   |                                                                        | 1.10 – 1.25<br>(1.14)/<br>2.18 – 2.55<br>(2.31)                                                    |         | of<br>hemelytron)                                                       | 2.08 – 2.53<br>(2.24)/<br>2.43 – 3.05<br>(2.65)                                                    |         |                                                 | 0.88 – 1.00<br>(0.91)/<br>0.85 – 0.99<br>(0.90)                                                    |         |
| <i>Lygus rugulipennis</i><br>–<br><i>Lygus punctatus</i> | Width of<br>head/<br>AntSeg1<br>length                                 | 1.05 – 1.25<br>(1.13)/<br>0.50 – 0.58<br>(0.53)<br>1.10 – 1.25<br>(1.17)/<br>0.55 – 0.68<br>(0.63) | 0,30509 | Width of<br>head/<br>Pronotum<br>width                                  | 1.05 – 1.25<br>(1.13)/<br>1.88 – 2.53<br>(2.13)<br>1.10 – 1.25<br>(1.17)/<br>2.08 – 2.60<br>(2.41) | 0,35278 | Width of<br>head/<br>cuneus<br>length<br>middle | 1.05 – 1.25<br>(1.13)/<br>0.93 – 1.20<br>(1.10)<br>1.10 – 1.25<br>(1.17)/<br>1.18 – 1.38<br>(1.28) | 0,40518 |
| <i>Lygus wagneri</i><br>–<br><i>Lygus rugulipennis</i>   | Pronotum<br>length/<br>body width<br>(widest part<br>of<br>hemelytron) | 1.05 – 1.33<br>(1.19)/<br>2.73 – 3.03<br>(2.87)<br>1.03 – 1.38<br>(1.20)/<br>2.18 – 3.03<br>(2.57) | 0,25848 | scutellum<br>length/<br>body width<br>(widest part<br>of<br>hemelytron) | 0.83 – 1.00<br>(0.91)/<br>2.73 – 3.03<br>(2.87)<br>0.80 – 1.05<br>(0.90)/<br>2.18 – 3.03<br>(2.57) | 0,29849 | Width of<br>head/<br>clavus<br>length max       | 1.08 – 1.23<br>(1.17)/<br>2.28 – 2.70<br>(2.51)<br>1.05 – 1.25<br>(1.13)/<br>1.88 – 2.65<br>(2.30) | 0,33886 |
