# Supplementary material
Source: publisher figshare collection journal article supplement (https://brill.figshare.com/articles/dataset/_/20342628)
Supplement: Supplementary file 4 [file 1]

**Table S1.** Voucher information for the specimens used for the comparison and phylogenies of the Palearctic species.

| Species              | Voucher | COI Genbank accession number | 16S Genbank accession number | Country                    | USI number        |
|----------------------|---------|------------------------------|------------------------------|----------------------------|-------------------|
| <i>L. gemellatus</i> | LO05    | MZ389848                     | MZ429344                     | Russia/ Volgograd Prov.    | ZISP_ENT 00000098 |
| <i>L. gemellatus</i> | LO31    | MZ389846                     | MZ429346                     | Russia/ Voronezh Prov.     | ZISP_ENT 00001008 |
| <i>L. gemellatus</i> | LO69    | MZ389847                     | MZ429345                     | Russia/ Volgograd Prov.    | ZISP_ENT 00000892 |
| <i>L. gemellatus</i> | LO80    | N/A                          | MZ429376                     | Russia/ Astrakhan Prov.    | ZISP_ENT 00000902 |
| <i>L. gemellatus</i> | LO92    | MZ389849                     | MZ429343                     | Russia/ Tyva Rep.          | ZISP_ENT 00001164 |
| <i>L. gemellatus</i> | LO65    | MZ389850                     | N/A                          | Russia/ Tyumen Prov.       | ZISP_ENT 00000976 |
| <i>L. gemellatus</i> | LO60    | MZ389851                     | N/A                          | Russia/ Saratov Prov.      | ZISP_ENT 00000973 |
| <i>L. gemellatus</i> | LO99    | N/A                          | MZ429374                     | Belarus                    | ZISP_ENT 00001173 |
| <i>L. gemellatus</i> | LO103   | N/A                          | MZ429373                     | Russia/ Bashkortostan Rep. | ZISP_ENT 00001243 |
| <i>L. gemellatus</i> | LO104   | MZ389852                     | MZ429342                     | Russia/ Orenburg Prov.     | ZISP_ENT 00001244 |
| <i>L. gemellatus</i> | LO81    | N/A                          | MZ429372                     | Russia/ Astrakhan Prov.    | ZISP_ENT 00000903 |
| <i>L. gemellatus</i> | LO83    | MZ389853                     | MZ429336                     | Russia/ Astrakhan Prov.    | ZISP_ENT 00000905 |
| <i>L. gemellatus</i> | LO100   | MZ389854                     | MZ429381                     | Mongolia                   | ZISP_ENT 00001240 |
| <i>L. gemellatus</i> | LO18    | MZ389855                     | MZ429341                     | Morocco                    | ZISP_ENT 00001021 |
| <i>L. gemellatus</i> | LO102   | MZ389856                     | MZ429340                     | Russia/ Komi Rep.          | ZISP_ENT 00001242 |
| <i>L. gemellatus</i> | LO72    | N/A                          | MZ429375                     | Russia/ Tyumen Prov.       | ZISP_ENT 00000894 |
| <i>L. gemellatus</i> | LO73    | N/A                          | MZ429377                     | Russia/ Tyumen Prov.       | ZISP_ENT 00000895 |
| <i>L. gemellatus</i> | LO87    | MZ389857                     | MZ429339                     | Russia/ Irkutsk Prov.      | ZISP_ENT 00001161 |
| <i>L. gemellatus</i> | LO86    | MZ389858                     | MZ429338                     | Russia/ Irkutsk Prov.      | ZISP_ENT 00001160 |
| <i>L. gemellatus</i> | LO85    | MZ389859                     | N/A                          | Russia/ Irkutsk Prov.      | ZISP_ENT 00001159 |
| <i>L. gemellatus</i> | LO61    | MZ389860                     | MZ429337                     | Russia/ Buryatia Rep.      | AMNH_PBI 00348724 |
| <i>L. gemellatus</i> | LO56    | MZ389861                     | MZ429335                     | Russia/ Astrakhan Prov.    | ZISP_ENT 00000969 |
| <i>L. gemellatus</i> | LO101   | N/A                          | MZ429380                     | Mongolia                   | ZISP_ENT 00001241 |
| <i>L. pratensis</i>  | LO02    | MZ389827                     | MZ429365                     | Russia/ Tatarstan Rep.     | ZISP_ENT 00000095 |
| <i>L. pratensis</i>  | LO03    | MZ389832                     | MZ429360                     | Russia/ Saratov Prov.      | ZISP_ENT 00000096 |
| <i>L. pratensis</i>  | LO06    | MZ389833                     | MZ429359                     | Poland                     | ZISP_ENT 00000099 |
| <i>L. pratensis</i>  | LO51    | MZ389821                     | MZ429371                     | Russia/ Voronezh Prov.     | ZISP_ENT 00000943 |
| <i>L. pratensis</i>  | LO42    | MZ389822                     | MZ429370                     | Russia/ Voronezh Prov.     | ZISP_ENT 00001012 |

|                        |                                  |          |          |                                  |                   |
|------------------------|----------------------------------|----------|----------|----------------------------------|-------------------|
| <i>L. pratensis</i>    | LO32                             | MZ389823 | MZ429369 | Russia/ Voronezh Prov.           | ZISP_ENT 00001009 |
| <i>L. pratensis</i>    | LO30                             | MZ389824 | MZ429368 | Russia/ Voronezh Prov.           | ZISP_ENT 00001007 |
| <i>L. pratensis</i>    | LO08                             | MZ389825 | MZ429367 | Ukraine                          | ZISP_ENT 00000101 |
| <i>L. pratensis</i>    | LO45                             | MZ389826 | MZ429366 | Russia/ Tatarstan Rep.           | ZISP_ENT 00000937 |
| <i>L. pratensis</i>    | LO93                             | MZ389828 | N/A      | Russia/ Stavropol Prov.          | ZISP_ENT 00001168 |
| <i>L. pratensis</i>    | LO50                             | MZ389829 | MZ429364 | Russia/ Saratov Prov.            | ZISP_ENT 00000942 |
| <i>L. pratensis</i>    | LO49                             | MZ389830 | MZ429363 | Russia/ Saratov Prov.            | ZISP_ENT 00000941 |
| <i>L. pratensis</i>    | LO48                             | MZ389831 | MZ429362 | Russia/ Saratov Prov.            | ZISP_ENT 00000940 |
| <i>L. pratensis</i>    | LO79                             | MZ389836 | MZ429356 | Italy                            | ZISP_ENT 00000901 |
| <i>L. pratensis</i>    | LO89                             | MZ389837 | MZ429355 | Russia/ Irkutsk Prov.            | ZISP_ENT 00001163 |
| <i>L. pratensis</i>    | LO75                             | MZ389838 | MZ429354 | Russia/ Dagestan Rep.            | ZISP_ENT 00000897 |
| <i>L. pratensis</i>    | LO07                             | MZ389839 | MZ429353 | Czech Republic                   | ZISP_ENT 00000100 |
| <i>L. pratensis</i>    | LO47                             | MZ389840 | MZ429352 | Russia/ Belgorod Prov.           | ZISP_ENT 00000939 |
| <i>L. pratensis</i>    | LO21                             | MZ389841 | MZ429351 | Russia/ Belgorod Prov.           | ZISP_ENT 00001024 |
| <i>L. pratensis</i>    | LO16                             | MZ389842 | MZ429350 | Russia/ Belgorod Prov.           | ZISP_ENT 00001019 |
| <i>L. pratensis</i>    | LO76                             | MZ389843 | MZ429349 | Belarus                          | ZISP_ENT 00000898 |
| <i>L. pratensis</i>    | LO77                             | MZ389844 | MZ429348 | Russia/ Bashkortostan Rep.       | ZISP_ENT 00000899 |
| <i>L. pratensis</i>    | LO57                             | MZ389845 | MZ429347 | Russia/ Bashkortostan Rep.       | ZISP_ENT 00000970 |
| <i>L. pratensis</i>    | LO19                             | MZ389864 | MZ429361 | Russia/ Saratov Prov.            | ZISP_ENT 00001022 |
| <i>L. pratensis</i>    | LO78                             | MZ389867 | N/A      | Russia/ Sverdlovsk Prov.         | ZISP_ENT 00000900 |
| <i>L. pratensis</i>    | from<br>Namyatova<br>et al. 2021 | MH359348 | MH407322 | Italy                            | UNSW_ENT 00027643 |
| <i>L. punctatus</i>    | LO27                             | MZ389816 | MZ429386 | Russia/ Voronezh Prov.           | ZISP_ENT 00001004 |
| <i>L. punctatus</i>    | LO63                             | N/A      | MZ429382 | Russia/ Yamalo-Nenets Aut. Dist. | ZISP_ENT 00000974 |
| <i>L. punctatus</i>    | LO98                             | MZ389817 | MZ429385 | Russia/ Sverdlovsk Prov.         | ZISP_ENT 00001172 |
| <i>L. punctatus</i>    | LO97                             | MZ389818 | N/A      | Russia/ Sverdlovsk Prov.         | ZISP_ENT 00001171 |
| <i>L. punctatus</i>    | LO24                             | MZ389819 | MZ429384 | Russia/ Ryazan Prov.             | ZISP_ENT 00001027 |
| <i>L. punctatus</i>    | LO84                             | MZ389820 | MZ429383 | Russia/ Irkutsk Prov.            | ZISP_ENT 00001158 |
| <i>L. rugulipennis</i> | LO01                             | MZ389809 | MZ429394 | Russia/ Lipetsk Prov.            | ZISP_ENT 00000094 |
| <i>L. rugulipennis</i> | LO44                             | MZ389798 | MZ429408 | Russia/ Voronezh Prov.           | ZISP_ENT 00001014 |
| <i>L. rugulipennis</i> | LO43                             | MZ389799 | MZ429407 | Russia/ Voronezh Prov.           | ZISP_ENT 00001013 |

|                                       |       |          |          |                                   |                   |
|---------------------------------------|-------|----------|----------|-----------------------------------|-------------------|
| <i>L. rugulipennis</i>                | LO29  | MZ389800 | MZ429406 | Russia/ Voronezh Prov.            | ZISP_ENT 00001006 |
| <i>L. rugulipennis</i>                | LO28  | MZ389801 | MZ429405 | Russia/ Voronezh Prov.            | ZISP_ENT 00001005 |
| <i>L. rugulipennis</i>                | LO113 | MZ389802 | MZ429404 | Russia/ Volgograd Prov.           | ZISP_ENT 00001078 |
| <i>L. rugulipennis</i>                | LO67  | MZ389803 | MZ429403 | Russia/ Tyumen Prov.              | ZISP_ENT 00000978 |
| <i>L. rugulipennis</i>                | LO46  | MZ389804 | MZ429401 | Russia/ Tatarstan Rep.            | ZISP_ENT 00000938 |
| <i>L. rugulipennis</i>                | LO115 | MZ389805 | MZ429400 | Russia/ Sverdlovsk Prov.          | ZISP_ENT 00001238 |
| <i>L. rugulipennis</i>                | LO59  | MZ389806 | MZ429399 | Russia/ Saratov Prov.             | ZISP_ENT 00000972 |
| <i>L. rugulipennis</i>                | LO25  | MZ389807 | MZ429398 | Russia/ Ryazan Prov.              | ZISP_ENT 00001002 |
| <i>L. rugulipennis</i>                | LO23  | MZ389808 | MZ429397 | Russia/ Ryazan Prov.              | ZISP_ENT 00001026 |
| <i>L. rugulipennis</i>                | LO26  | MZ389810 | MZ429393 | Russia/ Leningrad Prov.           | ZISP_ENT 00001003 |
| <i>L. rugulipennis</i>                | LO90  | MZ389811 | MZ429392 | Russia/ Irkutsk Prov.             | ZISP_ENT 00001164 |
| <i>L. rugulipennis</i>                | LO11  | MZ389812 | MZ429391 | France                            | ZISP_ENT 00000104 |
| <i>L. rugulipennis</i>                | LO74  | N/A      | MZ429390 | Russia/ Chukotka Autonomous Dist. | ZISP_ENT 00000896 |
| <i>L. rugulipennis</i>                | LO54  | MZ389814 | MZ429389 | Russia/ Chukotka Autonomous Dist. | AMNH_PBI 00350201 |
| <i>L. rugulipennis</i>                | LO14  | MZ389815 | MZ429388 | Bulgaria                          | ZISP_ENT 00001017 |
| <i>L. rugulipennis</i>                | LO12  | MZ389862 | MZ429395 | Norway                            | ZISP_ENT 00001015 |
| <i>L. rugulipennis</i>                | LO13  | MZ389863 | MZ429396 | Norway                            | ZISP_ENT 00001016 |
| <i>L. rugulipennis</i>                | LO20  | MZ389865 | MZ429387 | Russia/ Belgorod Prov.            | ZISP_ENT 00001023 |
| <i>L. rugulipennis</i>                | LO55  | MZ389866 | MZ429402 | Russia/ Krasnoyarsk Prov.         | AMNH_PBI 00350200 |
| <i>L. wagneri</i>                     | LO04  | MZ429409 | MZ429409 | Russia/ Buryatia Rep.             | ZISP_ENT 00000097 |
| <i>L. wagneri</i>                     | LO111 | MZ389788 | MZ429415 | Russia/ Sverdlovsk Prov.          | ZISP_ENT 00001085 |
| <i>L. wagneri</i>                     | LO70  | MZ389789 | MZ429414 | Russia/ Leningrad Prov.           | ZISP_ENT 00000093 |
| <i>L. wagneri</i>                     | LO109 | MZ389792 | MZ429412 | Russia/ Komi Rep.                 | ZISP_ENT 00001073 |
| <i>L. wagneri</i>                     | LO108 | MZ389793 | MZ429411 | Russia/ Komi Rep.                 | ZISP_ENT 00001077 |
| <i>L. wagneri</i>                     | LO88  | MZ389794 | N/A      | Russia/ Irkutsk Prov.             | ZISP_ENT 00001162 |
| <i>L. wagneri</i>                     | LO10  | MZ389795 | MZ429410 | Russia/ Buryatia Rep.             | ZISP_ENT 00000103 |
| <i>L. wagneri</i> or <i>pratensis</i> | LO22  | MZ389790 | MZ429413 | Russia/ Ryazan Prov.              | ZISP_ENT 00001025 |
| <i>L. wagneri</i> or <i>pratensis</i> | LO09  | MZ389791 | N/A      | Czech Republic                    | ZISP_ENT 00000102 |
| <i>L. wagneri</i> or <i>pratensis</i> | LO41  | MZ389834 | MZ429358 | Russia/ Voronezh Prov.            | ZISP_ENT 00001011 |
| <i>L. wagneri</i> or <i>pratensis</i> | LO17  | MZ389835 | MZ429357 | Russia/ Belgorod Prov.            | ZISP_ENT 00001020 |
| <i>Lygus</i> sp.                      | LO82  | N/A      | MZ429379 | Russia/ Astrakhan Prov.           | ZISP_ENT 00000904 |
| <i>Lygus</i> sp.                      | LO68  | MZ389797 | MZ429378 | Russia/ Volgograd Prov.           | ZISP_ENT 00000891 |

|                         |                              |           |           |            |                   |
|-------------------------|------------------------------|-----------|-----------|------------|-------------------|
| <i>Lygus</i> sp.        | from Namyatova et al. (2021) | MH359347  | MH407321  | Kazakhstan | UNSW_ENT 00027650 |
| <i>L. hesperus</i>      | Unpublished                  | KF679984  | KF679984  | USA        | N/A               |
| <i>L. lineolaris</i>    | from Roehrdanz et al. 2014   | NC_021975 | NC_021975 | USA        | N/A               |
| <i>Apolygus lucorum</i> | from Wang et al. (2021)      | KU234539  | KU234539  | China      | N/A               |

## References

- Namyatova, A. A., Schwartz, M. D., & Cassis, G. (2021). Determining the position of *Diomocoris*, *Micromimetes* and *Taylorilygus* in the *Lygus*-complex based on molecular data and first records of *Diomocoris* and *Micromimetes* from Australia, including four new species (Insecta: Hemiptera: Miridae: Mirinae). *Invertebrate Systematics*, 35(1), 90-131.
- Roehrdanz, R., Cameron, S. L., Toutges, M., & Wichmann, S. S. (2016). The complete mitochondrial genome of the tarnished plant bug, *Lygus lineolaris* (Heteroptera: Miridae). *Mitochondrial DNA Part A*, 27(1), 48-49.
- Wang, P., Li, H., Wang, Y., Zhang, J. H., Dai, X., Chang, J., ... & Cai, W. Z. (2014). The mitochondrial genome of the plant bug *Apolygus lucorum* (Hemiptera: Miridae): presently known as the smallest in Heteroptera. *Insect science*, 21(2), 159-173.
