# Supplementary material
Source: publisher figshare collection journal article supplement (https://brill.figshare.com/articles/dataset/_/20342628)
Supplement: Supplementary file 5 [file 1]

# **Identification and delimitation of the trans-Palearctic *Lygus* species (Insecta: Heteroptera: Miridae) using integrative approach**

**Anna A. Namyatova<sup>a,b,\*</sup>, Veronica D. Tyts<sup>c</sup> and Darya S. Bolshakova<sup>a,c</sup>**

<sup>a</sup>Zoological Institute, Russian Academy of Sciences, Universitetskaya emb. 1, St Petersburg, 199034, Russia

<sup>b</sup>All-Russian Institute of Plant Protection, St. Petersburg, 196608, Russia

<sup>c</sup>Department of Entomology, Faculty of Biology, St. Petersburg State University, St. Petersburg, Russia

\*Corresponding author; e-mail: [anna.namyatova@gmail.com](mailto:anna.namyatova@gmail.com)

ORCID iD: Namyatova: 0000-0001-9678-3430

**Supplementary material**
