# Supplementary material
Source: publisher figshare collection journal article supplement (https://brill.figshare.com/articles/dataset/_/20342628)
Supplement: Supplementary file 6 [file 1]

**Table S6.** P-distances and K2P distances for trans-Palearctic *Lygus* species.

|                                          | <b>P-distance<br/>range</b> | <b>p-distance<br/>mean</b> | <b>K2P distance<br/>range</b> | <b>K2P<br/>distance<br/>mean</b> |
|------------------------------------------|-----------------------------|----------------------------|-------------------------------|----------------------------------|
| <b>16S rRNA</b>                          |                             |                            |                               |                                  |
| trans-Palearctic representatives         | 0-0.0421                    | 0.0163                     | 0-0.0436                      | 0.0167                           |
| within <i>gemellatus</i>                 | 0-0.0169                    | 0.0030                     | 0-0.0172                      | 0.0030                           |
| within <i>pratensis</i>                  | 0-0.0119                    | 0.0031                     | 0-0.0120                      | 0.0031                           |
| within <i>punctatus</i>                  | 0                           | 0                          | 0                             | 0                                |
| within <i>rugulipennis</i>               | 0-0.0167                    | 0.0037                     | 0-0.0169                      | 0.0038                           |
| within <i>wagneri</i>                    | 0-0.0056                    | 0.0034                     | 0-0.0057                      | 0.0038                           |
| <i>gemellatus</i> vs <i>pratensis</i>    | 0.0028-0.0169               | 0.0096                     | 0.0028-0.0212                 | 0.0097                           |
| <i>gemellatus</i> vs. <i>punctatus</i>   | 0.0222-0.0291               | 0.0263                     | 0.0227-0.0299                 | 0.027                            |
| <i>gemellatus</i> vs <i>rugulipennis</i> | 0.0195-0.0368               | 0.0287                     | 0.0199-0.0381                 | 0.0295                           |
| <i>gemellatus</i> vs <i>wagneri</i>      | 0.0028-0.0169               | 0.0086                     | 0.0028-0.0172                 | 0.0073                           |
| <i>pratensis</i> <i>punctatus</i>        | 0.0224-0.0329               | 0.0279                     | 0.0229-0.0339                 | 0.0286                           |
| <i>pratensis</i> <i>rugulipennis</i>     | 0.0186-0.042                | 0.03                       | 0.0190-0.0436                 | 0.0309                           |
| <i>pratensis</i> <i>wagneri</i>          | 0-0.009                     | 0.0031                     | 0-0.0090                      | 0.0035                           |
| <i>punctatus</i> <i>rugulipennis</i>     | 0.0084-0.0204               | 0.0138                     | 0.0084-0.0208                 | 0.014                            |
| <i>punctatus</i> <i>wagneri</i>          | 0.0249-0.0291               | 0.0273                     | 0.0256-0.0299                 | 0.028                            |
| <i>rugulipennis</i> <i>wagneri</i>       | 0.0223-0.0361               | 0.0295                     | 0.0228-0.0374                 | 0.0304                           |
| <b>COI</b>                               |                             |                            |                               |                                  |
| Palearctic representatives               | 0-0.0678                    | 0.0262                     | 0-0.0717                      | 0.0273                           |
| within <i>gemellatus</i>                 | 0-0.0081                    | 0.0014                     | 0-0.0083                      | 0.0014                           |
| within <i>pratensis</i>                  | 0-0.0027                    | 0.0006                     | 0-0.0027                      | 0.0006                           |
| within <i>punctatus</i>                  | 0-0.0014                    | 0.0005                     | 0-0.0014                      | 0.0005                           |
| within <i>rugulipennis</i>               | 0-0.0260                    | 0.0039                     | 0-0.0267                      | 0.0039                           |
| <i>gemellatus</i> vs <i>pratensis</i>    | 0.0013-0.0084               | 0.0030                     | 0.0013-0.0084                 | 0.0030                           |

|                                             |               |        |               |        |
|---------------------------------------------|---------------|--------|---------------|--------|
| <i>gemellatus</i> vs.<br><i>punctatus</i>   | 0.0507-0.0593 | 0.0547 | 0.0528-0.0586 | 0.0572 |
| <i>gemellatus</i> vs<br><i>rugulipennis</i> | 0.0494-0.0614 | 0.0551 | 0.0494-0.0614 | 0.0551 |
| <i>gemellatus</i> vs<br><i>wagneri</i>      | 0.0013-0.0064 | 0.0022 | 0.0013-0.0068 | 0.0022 |
| <i>pratensis</i> vs<br><i>punctatus</i>     | 0.0531-0.0678 | 0.0557 | 0.0553-0.0717 | 0.0583 |
| <i>pratensis</i><br><i>rugulipennis</i>     | 0.0512-0.0677 | 0.0561 | 0.0535-0.716  | 0.0588 |
| <i>pratensis</i> vs<br><i>wagneri</i>       | 0-0.0027      | 0.0009 | 0-0.0027      | 0.0009 |
| <i>punctatus</i> vs<br><i>rugulipennis</i>  | 0.0051-0.0243 | 0.0078 | 0.0053-0.0248 | 0.0078 |
| <i>punctatus</i> vs<br><i>wagneri</i>       | 0.0545-0.0557 | 0.0552 | 0.0570-0.0583 | 0.0552 |
| <i>rugulipennis</i><br>vs <i>wagneri</i>    | 0.0513-0.0616 | 0.0557 | 0.0535-0.0649 | 0.0583 |
