# Supplementary material
Source: publisher figshare collection journal article supplement (https://brill.figshare.com/articles/dataset/_/20342628)
Supplement: Supplementary file 7 [file 1]

**Table S3.** Results of ANOVA and Tukey's tests on isosize value. p-value <0.001 marked green, <0.01 marked yellow.

|                                                        | <b>Male</b> | <b>Female</b> |
|--------------------------------------------------------|-------------|---------------|
| <i>Lygus pratensis</i> –<br><i>Lygus gemellatus</i>    | 0,9127329   | 0,5880135     |
| <i>Lygus punctatus</i> –<br><i>Lygus gemellatus</i>    | 0.0000000   | 0,0000114     |
| <i>Lygus rugulipennis</i> –<br><i>Lygus gemellatus</i> | 0,0099358   | 0,1028886     |
| <i>Lygus wagneri</i> –<br><i>Lygus gemellatus</i>      | 0,0000021   | 0,0683904     |
| <i>Lygus punctatus</i> –<br><i>Lygus pratensis</i>     | 0.0000000   | 0,0000000     |
| <i>Lygus rugulipennis</i> –<br><i>Lygus pratensis</i>  | 0,0006620   | 0,8515593     |
| <i>Lygus wagneri</i> –<br><i>Lygus pratensis</i>       | 0,0000916   | 0,0008410     |
| <i>Lygus rugulipennis</i> –<br><i>Lygus punctatus</i>  | 0.0000000   | 0,0000000     |
| <i>Lygus wagneri</i> –<br><i>Lygus punctatus</i>       | 0,0017293   | 0,0850398     |
| <i>Lygus wagneri</i> –<br><i>Lygus rugulipennis</i>    | 0.0000000   | 0,0000160     |
| Anova (Pr(>F))                                         | 0.0000000   | 0.0000000     |
